# Supplementary material for: QSAR modeling of the toxicity classification of superparamagnetic iron oxide nanoparticles (SPIONs) in stem-cell monitoring applications: an integrated study from data curation to model development
Source: PubMed Central journal article supplement — RSC Adv. 2020 Feb 3;10(9):5385–91. doi: 10.1039/c9ra09475j (PMC9049038; doi:10.1039/c9ra09475j), 2020-02-03
Supplement: RA-010-C9RA09475J-s001.pdf [file RA-010-C9RA09475J-s001.pdf]

| Material ID | Material type                          | Magnetic core | Surface Coating                                                         | Zeta Potential (mV) | Particle size (nm) | Relaxivity r2 (s-1/mM) | Field strength (T) | Fe/cell (µg) | Cell Viability (%) | Toxicity |
|-------------|----------------------------------------|---------------|-------------------------------------------------------------------------|---------------------|--------------------|------------------------|--------------------|--------------|--------------------|----------|
| 0           | Fe2O3-PLL                              | Maghemite     | (polycationic poly(L-lysine) (PLL)                                      | NA                  | 15                 | NA                     | 1.5                | 64.51        | 90                 | 0        |
| 1           | uncoated                               | Maghemite     | uncoated                                                                | -42                 | 10                 | 549                    | 4.7                | 29.3         | 23                 | 1        |
| 2           | D-manose-coated-g-Fe2O3                | Maghemite     | D-manose                                                                | NA                  | 2                  | 509                    | 4.7                | 21.1         | 75                 | 1        |
| 3           | Fe2O3-PLL                              | Maghemite     | (polycationic poly(L-lysine) (PLL)                                      | NA                  | 10                 | 492                    | 4.7                | 24.5         | 75                 | 1        |
| 4           | PDMAAm-coated-g-Fe2O3-PLL              | Maghemite     | poly(N,N-dimethylacrylamide) (PDMAAm)                                   | NA                  | 10                 | 89                     | 4.7                | 23.2         | 75                 | 1        |
| 5           | N-dodecyl-PEI2k/SPIO                   | Magnetite     | N-dodecyl-grafted PEI 2K                                                | 40                  | 54.7               | 345                    | 3                  | 7.1          | 100                | 0        |
| 6           | iron oxide-loaded cationic nanovesicle | Magnetite     | PEI-SA                                                                  | 20                  | 150                | 343.1                  | 1.5                | 50.02        | 100                | 0        |
| 7           | iron oxide-loaded cationic nanovesicle | Magnetite     | PEG-PGA                                                                 | 20                  | 150                | 343.1                  | 1.5                | 50.02        | 100                | 0        |
| 8           | CMCS-SPIONs                            | Magnetite     | Carboxymethyl-chitosan                                                  | -21.4               | 55.4               | 160.5                  | 1.5                | 26.7         | 120                | 0        |
| 9           | ED-Pullulan coating SPIO               | Magnetite     | Ethylenediamine Pullulan                                                | 10                  | 94                 | NA                     | 7                  | 65           | 120                | 0        |
| 10          | IONP-GPEG-HA                           | Magnetite     | Amine-functionalized six-armed PEG covalently linked to hyaluronic acid | -9.1                | 75                 | 454.5                  | 3                  | 1459         | 100                | 0        |
| 11          | PDMAAm-coated-g-Fe2O3-PLL              | Maghemite     | poly(N,N-dimethylacrylamide) (PDMAAm)                                   | NA                  | 77.8               | 27.26                  | 0.5                | 36.9         | 120                | 0        |
| 12          | Citrate SPION                          | Magnetite     | Citrate                                                                 | -27.3               | 90.13              | NA                     | 7                  | 69.6         | NA                 | 0        |
| 13          | D-manose-coated SPIONs                 | Maghemite     | D-manose                                                                | NA                  | 6                  | 140.4                  | 0.5                | 51.7         | 75                 | 1        |
| 14          | SPIO@SiO2-NH2                          | Magnetite     | SiO2-NH2                                                                | NA                  | 8.5                | 43.5                   | 3                  | 68.7         | 95.7               | 0        |
| 15          | TAT-CLIO                               | Magnetite     | Tat peptide functionalized cross-linking dextran                        | NA                  | 65.2               | 73.4                   | 0.47               | 2.15         | 101                | 0        |

**Table S1** Full dataset of SPION's NPs after pre-processing, comprising of their physicochemical and toxicological properties.
